# Supplementary figures and images for: Comparison of Surgical Resection and Percutaneous Ultrasonographic Guided Radiofrequency Ablation for Initial Recurrence of Hepatocellular Carcinoma in Early Stage following Curative Treatment
Source: MDPI journal article supplement (doi:10.3390/cancers14225524), 2022-11-10

# Supplementary Figure S1

(a)

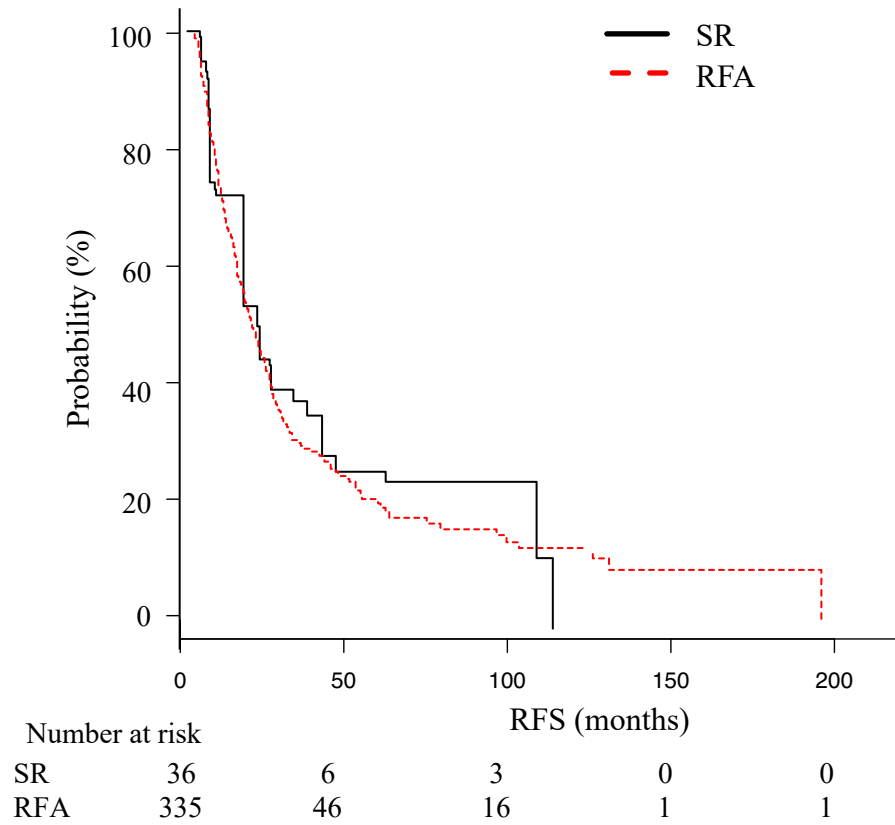

(b)

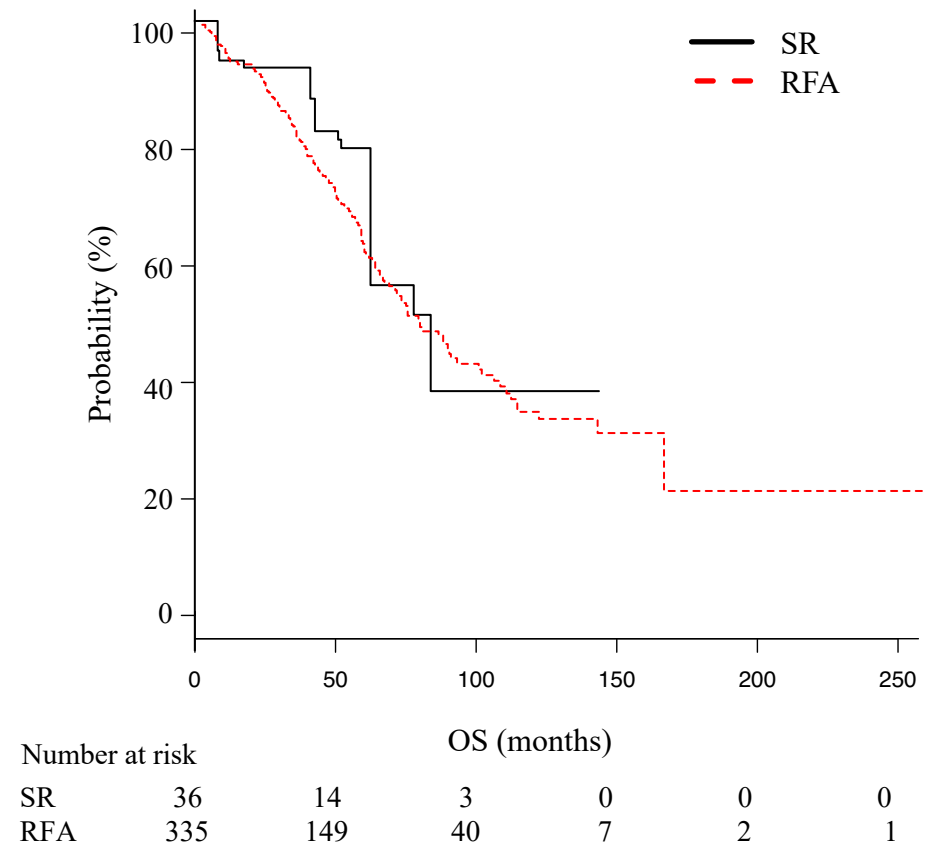

Supplement: s1 [file s1]
